# Supplementary material
Source: PubMed Central journal article supplement (PMC7589058)
Supplement: jamaneurol-e203753-s001.pdf [file jamaneurol-e203753-s001.pdf]

## Supplementary Online Content

Stephen CD, Fung V, Lungu CI, Espay AJ. Assessment of emergency department and inpatient use and costs in adult and pediatric functional neurological disorders. *JAMA Neurol*. Published online October 26, 2020. doi:10.1001/jamaneurol.2020.3753

**eTable 1.** List of ICD-9-CM and ICD-10-CM Diagnosis and Procedure Codes Used in Analyses

**eTable 2.** Composition of FND Diagnosis and Overlap Between FND and Neurological Comparator Diagnoses Across Databases

**eTable 3.** Missing Data for Health Care Utilization Comparison From NIS 2017, KID 2016, and NEDS 2017

**eTable 4.** Clinical Characteristics of FND vs Other Neurological Disorders in Adult and Pediatric Populations and Inpatient Health Care Resource Utilization (NIS 2014 and KID 2012 ICD-9 Comparator Data)

**eTable 5.** Ten-Year Annual Total Charge Estimates Across All Databases in Adults and Children 2008-2017, Highlighting Years With Overlap

This supplementary material has been provided by the authors to give readers additional information about their work.

**eTable 1. List of ICD-9-CM and ICD10-CM/PCS diagnosis and procedure codes used in analyses**

| Term                                       | Code                                                                  | Description                                                   |
|--------------------------------------------|-----------------------------------------------------------------------|---------------------------------------------------------------|
| <b>ICD-9-CM diagnosis code dictionary</b>  |                                                                       |                                                               |
| FND                                        | 300.11                                                                | Conversion disorder                                           |
|                                            | 306.0                                                                 | Musculoskeletal malfunction arising from mental factors       |
| Other neurological disorders (Other neuro) | 320 and sub codes                                                     | Bacterial meningitis                                          |
|                                            | 321 and sub codes                                                     | Meningitis due to other organisms                             |
|                                            | 322 and sub codes                                                     | Meningitis of unspecified cause                               |
|                                            | 323 and sub codes                                                     | Encephalitis myelitis and encephalomyelitis                   |
|                                            | 324 and sub codes                                                     | Intracranial and intraspinal abscess                          |
|                                            | 325 and sub codes                                                     | Phlebitis and thrombophlebitis of intracranial venous sinuses |
|                                            | 326 and sub codes                                                     | Late effects of intracranial abscess or pyogenic infection    |
|                                            | 330 and sub codes                                                     | Cerebral degenerations usually manifest in childhood          |
|                                            | 331 and sub codes                                                     | Other cerebral degenerations                                  |
|                                            | 332 and sub codes                                                     | Parkinson's disease                                           |
|                                            | 333 and sub codes                                                     | Other extrapyramidal disease and abnormal movement disorders  |
|                                            | 334 and sub codes                                                     | Spinocerebellar disease                                       |
|                                            | 335 and sub codes                                                     | Anterior horn cell disease                                    |
|                                            | 336 and sub codes                                                     | Other diseases of spinal cord                                 |
|                                            | 338.0                                                                 | Central pain syndrome                                         |
|                                            | 340 and sub codes                                                     | Multiple sclerosis                                            |
|                                            | 341 and sub codes                                                     | Other demyelinating diseases of central nervous system        |
|                                            | 342 and sub codes                                                     | Hemiplegia and hemiparesis                                    |
|                                            | 343 and sub codes                                                     | Infantile cerebral palsy                                      |
|                                            | 344 and sub codes                                                     | Other paralytic syndromes                                     |
|                                            | 345 and sub codes                                                     | Epilepsy and recurrent seizures                               |
|                                            | 348.2                                                                 | Benign intracranial hypertension                              |
|                                            | 348.81                                                                | Temporal sclerosis                                            |
|                                            | 348.9                                                                 | Unspecified condition of brain                                |
|                                            | 349.0                                                                 | Reaction to spinal or lumbar puncture                         |
|                                            | 349.2                                                                 | Disorders of meninges, not elsewhere classified               |
|                                            | 350 and sub codes                                                     | Trigeminal nerve disorders                                    |
|                                            | 351 and sub codes                                                     | Facial nerve disorders                                        |
|                                            | 352.5                                                                 | Disorders of hypoglossal [12th] nerve                         |
|                                            | 352.6                                                                 | Multiple cranial nerve palsies                                |
|                                            | 352.9                                                                 | Unspecified disorder of cranial nerves                        |
| 356 and sub codes                          | Hereditary and idiopathic peripheral neuropathy (not including 356.4) |                                                               |

|                                                  |                     |                                                                                                |
|--------------------------------------------------|---------------------|------------------------------------------------------------------------------------------------|
|                                                  |                     | Idiopathic progressive polyneuropathy)                                                         |
|                                                  | 357.0               | Acute infective polyneuritis                                                                   |
|                                                  | 357.4               | Polyneuropathy in malignant disease                                                            |
|                                                  | 357.81              | Chronic inflammatory demyelinating polyneuritis                                                |
|                                                  | 357.89              | Other inflammatory and toxic neuropathy                                                        |
|                                                  | 358 and sub codes   | Myoneural disorders                                                                            |
|                                                  | 359 and sub codes   | Muscular dystrophies and other myopathies                                                      |
|                                                  | 339 and sub codes   | Other headache syndromes                                                                       |
|                                                  | 346 and sub codes   | Migraine                                                                                       |
|                                                  | 377.3 and sub codes | Optic neuritis                                                                                 |
|                                                  | 377.41              | Ischemic optic neuropathy                                                                      |
|                                                  | 377.5 and sub codes | Disorders of optic chiasm                                                                      |
|                                                  | 377.6 and sub codes | Disorders of other visual pathways                                                             |
|                                                  | 377.7 and sub codes | Disorders of visual cortex                                                                     |
|                                                  | 377.9 and sub codes | Unspecified disorder of optic nerve and visual pathways                                        |
|                                                  | 378.7 and sub codes | Other specified strabismus                                                                     |
|                                                  | 378.8 and sub codes | Other disorders of binocular eye movements                                                     |
|                                                  | 386.2               | Vertigo of central origin                                                                      |
|                                                  | 433.01              | Occlusion and stenosis of basilar artery with cerebral infarction                              |
|                                                  | 433.11              | Occlusion and stenosis of carotid artery with cerebral infarction                              |
|                                                  | 433.21              | Occlusion and stenosis of vertebral artery with cerebral infarction                            |
|                                                  | 433.31              | Occlusion and stenosis of multiple and bilateral precerebral arteries with cerebral infarction |
|                                                  | 433.81              | Occlusion and stenosis of other specified precerebral artery with cerebral infarction          |
|                                                  | 433.91              | Occlusion and stenosis of unspecified precerebral artery with cerebral infarction              |
|                                                  | 434.01              | Cerebral thrombosis with cerebral infarction                                                   |
|                                                  | 434.11              | Cerebral embolism with cerebral infarction                                                     |
|                                                  | 434.91              | Cerebral artery occlusion, unspecified with cerebral infarction                                |
|                                                  | 435 and sub codes   | Transient cerebral ischemia                                                                    |
|                                                  | 436 and sub codes   | Acute, but ill-defined, cerebrovascular disease                                                |
|                                                  | 437 and sub codes   | Other and ill-defined cerebrovascular disease                                                  |
|                                                  | 438 and sub codes   | Late effects of cerebrovascular disease                                                        |
| Other neurological disorders code non-inclusions | 290 and sub codes   | Dementias                                                                                      |
|                                                  | 327 and sub codes   | Organic sleep disorders                                                                        |
|                                                  | 337 and sub codes   | Disorders of the autonomic nervous system                                                      |

|                                                                            |                     |                                                                                                                                  |
|----------------------------------------------------------------------------|---------------------|----------------------------------------------------------------------------------------------------------------------------------|
|                                                                            | 338 and sub codes   | Pain, not elsewhere classified other than 338.0                                                                                  |
|                                                                            | 348.0               | Cerebral cysts                                                                                                                   |
|                                                                            | 348.1               | Anoxic brain damage                                                                                                              |
|                                                                            | 348.3 and sub codes | Encephalopathy, not elsewhere classified                                                                                         |
|                                                                            | 348.4               | Compression of brain                                                                                                             |
|                                                                            | 348.5               | Cerebral edema                                                                                                                   |
|                                                                            | 348.8 and sub codes | Other conditions of brain                                                                                                        |
|                                                                            | 348.82              | Brain death                                                                                                                      |
|                                                                            | 348.89              | Other conditions of brain                                                                                                        |
|                                                                            | 352.0               | Disorders of olfactory (1st) nerve                                                                                               |
|                                                                            | 352.1               | Glossopharyngeal neuralgia                                                                                                       |
|                                                                            | 356.4               | Idiopathic progressive polyneuropathy                                                                                            |
|                                                                            | 377.0               | Papilledema                                                                                                                      |
|                                                                            | 386.1 and sub codes | Other and unspecified peripheral vertigo                                                                                         |
|                                                                            | 386.3 and sub codes | Labyrinthitis                                                                                                                    |
|                                                                            | 780.3 and sub codes | Convulsions                                                                                                                      |
|                                                                            | 781 and sub codes   | Symptoms involving nervous and musculoskeletal systems                                                                           |
|                                                                            | 784 and sub codes   | Headache                                                                                                                         |
|                                                                            | 792.0               | Nonspecific abnormal findings in cerebrospinal fluid                                                                             |
| Other neurological disorders code exclusions = Neurosurgery                | 191 and sub codes   | Malignant neoplasm of brain                                                                                                      |
|                                                                            | 192 and sub codes   | Malignant neoplasm of other and unspecified parts of nervous system                                                              |
|                                                                            | 198.3               | Secondary malignant neoplasm of brain and spinal cord                                                                            |
|                                                                            | 225 and sub codes   | Benign neoplasm of brain and other parts of nervous system                                                                       |
|                                                                            | 430 and sub codes   | Subarachnoid hemorrhage                                                                                                          |
|                                                                            | 431 and sub codes   | Intracerebral hemorrhage                                                                                                         |
|                                                                            | 432 and sub codes   | Other and unspecified intracranial hemorrhage                                                                                    |
| Neuro-inflammatory/demyelinating disease including multiple sclerosis (MS) | 340 and sub codes   | Multiple sclerosis                                                                                                               |
|                                                                            | 341 and sub codes   | Other demyelinating diseases of central nervous system                                                                           |
| Refractory epilepsy (excluding partial or generalized status epilepticus)  | 345.01              | Generalized nonconvulsive epilepsy, with intractable epilepsy                                                                    |
|                                                                            | 345.11              | Generalized convulsive epilepsy, with intractable epilepsy                                                                       |
|                                                                            | 345.41              | Localization-related (focal) (partial) epilepsy and epileptic syndromes with complex partial seizures, with intractable epilepsy |
|                                                                            | 345.51              | Localization-related (focal) (partial) epilepsy and epileptic syndromes with simple partial seizures, with intractable epilepsy  |
|                                                                            | 345.61              | Infantile spasms, with intractable epilepsy                                                                                      |
|                                                                            | 345.71              | Epilepsia partialis continua                                                                                                     |

|                                                                                                                                      |                                                 |                                                                           |
|--------------------------------------------------------------------------------------------------------------------------------------|-------------------------------------------------|---------------------------------------------------------------------------|
|                                                                                                                                      | 345.81                                          | Other forms of epilepsy and recurrent seizures, with intractable epilepsy |
|                                                                                                                                      | 345.91                                          | Epilepsy, unspecified, with intractable epilepsy                          |
| Anterior horn cell diseases (AHCD)                                                                                                   | 335 and sub codes                               | Anterior horn cell disease                                                |
| Any psychiatric symptoms (any psych sx) not including drug or alcohol abuse, obsessive compulsive disorder or disorders of attention | 295 and sub codes                               | Schizophrenic disorders                                                   |
|                                                                                                                                      | 296 and sub codes                               | Episodic mood disorders                                                   |
|                                                                                                                                      | 297 and sub codes                               | Delusional disorders                                                      |
|                                                                                                                                      | 298 and sub codes                               | Other nonorganic psychoses                                                |
|                                                                                                                                      | 300.0 and sub codes                             | Anxiety states                                                            |
|                                                                                                                                      | 300.2 and sub codes                             | Phobic disorders                                                          |
|                                                                                                                                      | 301 and sub codes                               | Personality disorders                                                     |
|                                                                                                                                      | 308 and sub codes                               | Acute reaction to stress (proxy for PTSD)                                 |
| Mood disorders                                                                                                                       | 296 and sub codes                               | Episodic mood disorders                                                   |
| Anxiety disorders                                                                                                                    | 300.0 and sub codes                             | Anxiety states                                                            |
|                                                                                                                                      | 300.2 and sub codes                             | Phobic disorders                                                          |
| Functional somatic disorders (FSD)                                                                                                   | 564.1                                           | Irritable bowel syndrome                                                  |
|                                                                                                                                      | 729.1                                           | Myalgia and myositis, unspecified (fibromyalgia proxy)                    |
|                                                                                                                                      | 780.71                                          | Chronic fatigue syndrome                                                  |
|                                                                                                                                      | 300.8 and sub codes                             | Somatoform disorders                                                      |
|                                                                                                                                      | 337.20                                          | Reflex sympathetic dystrophy, unspecified                                 |
|                                                                                                                                      | 337.21                                          | Reflex sympathetic dystrophy of the upper limb                            |
|                                                                                                                                      | 337.22                                          | Reflex sympathetic dystrophy of the lower limb                            |
|                                                                                                                                      | 337.29                                          | Reflex sympathetic dystrophy of other specified site                      |
|                                                                                                                                      | 306.1                                           | Respiratory malfunction arising from mental factors                       |
|                                                                                                                                      | 306.2                                           | Cardiovascular malfunction arising from mental factors                    |
|                                                                                                                                      | 306.3                                           | Skin disorder arising from mental factors                                 |
|                                                                                                                                      | 306.4                                           | Gastrointestinal malfunction arising from mental factors                  |
|                                                                                                                                      | 306.5 and sub codes                             | Genitourinary malfunction arising from mental factors                     |
|                                                                                                                                      | 306.50                                          | Psychogenic genitourinary malfunction, unspecified                        |
|                                                                                                                                      | 306.51                                          | Psychogenic vaginismus                                                    |
|                                                                                                                                      | 306.52                                          | Psychogenic dysmenorrhea                                                  |
|                                                                                                                                      | 306.53                                          | Psychogenic dysuria                                                       |
|                                                                                                                                      | 306.59                                          | Other genitourinary malfunction arising from mental factors               |
|                                                                                                                                      | 306.6                                           | Endocrine disorder arising from mental factors                            |
|                                                                                                                                      | 306.7                                           | Disorder of organs of special sense arising from mental factors           |
| 306.8                                                                                                                                | Other specified psychophysiological malfunction |                                                                           |
| 306.9                                                                                                                                | Unspecified psychophysiological malfunction     |                                                                           |

| <b>ICD-10-CM diagnosis code dictionary</b> |                       |                                                                     |
|--------------------------------------------|-----------------------|---------------------------------------------------------------------|
| FND                                        | F44.4                 | Conversion disorder with motor symptom or deficit                   |
|                                            | F44.5                 | Conversion disorder with seizures or convulsions                    |
|                                            | F44.6                 | Conversion disorder with sensory symptom or deficit                 |
|                                            | F44.7                 | Conversion disorder with mixed symptom presentation                 |
| Other neurological disorders (Other neuro) | G00-G09 and sub codes | Inflammatory diseases of the central nervous system                 |
|                                            | G10-G14 and sub codes | Systemic atrophies primarily affecting the central nervous system   |
|                                            | G20-G26 and sub codes | Extrapyramidal and movement disorders                               |
|                                            | G30-G32 and sub codes | Other degenerative diseases of the nervous system                   |
|                                            | G35-G37 and sub codes | Demyelinating diseases of the central nervous system                |
|                                            | G40 and sub codes     | Epilepsy and recurrent seizures                                     |
|                                            | G43 and sub codes     | Migraine                                                            |
|                                            | G44 and sub codes     | Other headache syndromes                                            |
|                                            | G45 and sub codes     | Transient cerebral ischemic attacks and related syndromes           |
|                                            | G46 and sub codes     | Vascular syndromes of brain in cerebrovascular diseases             |
|                                            | G50 and sub codes     | Disorders of trigeminal nerve                                       |
|                                            | G51 and sub codes     | Facial nerve disorders                                              |
|                                            | G52.1 and sub codes   | Disorders of glossopharyngeal nerve                                 |
|                                            | G52.2 and sub codes   | Disorders of vagus nerve                                            |
|                                            | G52.3 and sub codes   | Disorders of hypoglossal nerve                                      |
|                                            | G52.7 and sub codes   | Disorders of multiple cranial nerves                                |
|                                            | G52.8 and sub codes   | Disorders of other specified cranial nerves                         |
|                                            | G52.9 and sub codes   | Cranial nerve disorder, unspecified                                 |
|                                            | G53 and sub codes     | Cranial nerve disorders in diseases classified elsewhere            |
|                                            | G54 and sub codes     | Nerve root and plexus disorders                                     |
|                                            | G55 and sub codes     | Nerve root and plexus compressions in diseases classified elsewhere |
|                                            | G56 and sub codes     | Mononeuropathies of upper limb                                      |
|                                            | G57 and sub codes     | Mononeuropathies of lower limb                                      |
|                                            | G58 and sub codes     | Other mononeuropathies                                              |
|                                            | G59 and sub codes     | Mononeuropathy in diseases classified elsewhere                     |
|                                            | G60.0                 | Hereditary motor and sensory neuropathy                             |

|                      |                                                                             |
|----------------------|-----------------------------------------------------------------------------|
| G60.1                | Refsum's disease                                                            |
| G60.2                | Neuropathy in association with hereditary ataxia                            |
| G60.8                | Other hereditary and idiopathic neuropathies                                |
| G61 and sub codes    | Inflammatory polyneuropathy                                                 |
| G64 and sub codes    | Other disorders of peripheral nervous system                                |
| G65 and sub codes    | Sequelae of inflammatory and toxic polyneuropathies                         |
| G70 and sub codes    | Myasthenia gravis and other myoneural disorders                             |
| G71 and sub codes    | Primary disorders of muscles                                                |
| G72.0                | Drug-induced myopathy                                                       |
| G72.1                | Alcoholic myopathy                                                          |
| G72.2                | Myopathy due to other toxic agents                                          |
| G72.3                | Periodic paralysis                                                          |
| G72.4                | Inflammatory and immune myopathies, not elsewhere classified                |
| G73 and sub codes    | Disorders of myoneural junction and muscle in diseases classified elsewhere |
| G80-83 and sub codes | Cerebral palsy and other paralytic syndromes                                |
| G89.0                | Central pain syndrome                                                       |
| G91.2                | (Idiopathic) normal pressure hydrocephalus                                  |
| G93.2                | Benign intracranial hypertension                                            |
| G93.49               | Other encephalopathy                                                        |
| G93.7                | Reye's syndrome                                                             |
| G93.81               | Temporal sclerosis                                                          |
| G94                  | Other disorders of brain in diseases classified elsewhere                   |
| G99 and sub codes    | Other disorders of nervous system in diseases classified elsewhere          |
| H46                  | Optic neuritis                                                              |
| H47.01               | Ischemic optic neuropathy                                                   |
| H47.49               | Disorders of optic chiasm in (due to) other disorders                       |
| H47.5                | Disorders of other visual pathways                                          |
| H47.6 and sub codes  | Disorders of visual cortex                                                  |
| H50.89 and sub codes | Other specified strabismus                                                  |
| H55.89               | Other irregular eye movements                                               |
| H81.4                | Vertigo of central origin                                                   |
| I63 and sub codes    | Cerebral infarction                                                         |
| I67.7                | Cerebral arteritis, not elsewhere classified                                |
| I67.8                | Other specified cerebrovascular diseases                                    |

|                                                             |                       |                                                                                                           |
|-------------------------------------------------------------|-----------------------|-----------------------------------------------------------------------------------------------------------|
|                                                             | I69 and sub codes     | Sequelae of cerebrovascular disease                                                                       |
| Other neurological disorders code non-inclusions            | F01-F09 and sub codes | Mental disorders due to know physiological conditions                                                     |
|                                                             | G47 and sub codes     | Sleep disorders                                                                                           |
|                                                             | G52.0                 | Disorders of olfactory nerve                                                                              |
|                                                             | G60.3                 | Idiopathic progressive polyneuropathy                                                                     |
|                                                             | G60.9                 | Hereditary and idiopathic neuropathy, unspecified                                                         |
|                                                             | G62 and sub codes     | Other and unspecified polyneuropathies                                                                    |
|                                                             | G63 and sub codes     | Polyneuropathy in diseases classified elsewhere                                                           |
|                                                             | G72.8                 | Other specified myopathies                                                                                |
|                                                             | G72.9                 | Myopathy, unspecified                                                                                     |
|                                                             | G89 and sub codes     | Pain, not elsewhere classified (other than G89.0, Central pain)                                           |
|                                                             | G90 and sub codes     | Disorders of autonomic nervous system                                                                     |
|                                                             | G91 and sub codes     | Hydrocephalus (other than G91.2, (Idiopathic) normal pressure hydrocephalus)                              |
|                                                             | G92 and sub codes     | Toxic encephalopathy                                                                                      |
|                                                             | G93.0                 | Cerebral cysts                                                                                            |
|                                                             | G93.1                 | Anoxic brain damage                                                                                       |
|                                                             | G93.3                 | Postviral fatigue syndrome                                                                                |
|                                                             | G93.40                | Encephalopathy, unspecified                                                                               |
|                                                             | G93.41                | Metabolic encephalopathy                                                                                  |
|                                                             | G93.5                 | Compression of brain                                                                                      |
|                                                             | G93.6                 | Cerebral edema                                                                                            |
|                                                             | G93.82                | Brain death                                                                                               |
|                                                             | G93.89                | Other specified disorders of brain                                                                        |
|                                                             | G93.9                 | Disorder of brain, unspecified                                                                            |
|                                                             | G95 and sub codes     | Other and unspecified diseases of spinal cord                                                             |
|                                                             | G96 and sub codes     | Other disorders of central nervous system                                                                 |
|                                                             | G97 and sub codes     | Intraoperative and postprocedural complications and disorders of nervous system, not elsewhere classified |
|                                                             | G98 and sub codes     | Other disorders of nervous system not elsewhere classified                                                |
|                                                             | R25-R29 and sub codes | Symptoms and signs involving the nervous and musculoskeletal systems                                      |
|                                                             | R51 and sub codes     | Headache                                                                                                  |
|                                                             | R56 and sub codes     | Convulsions, not elsewhere classified                                                                     |
|                                                             | R83 and sub codes     | Abnormal findings in cerebrospinal fluid                                                                  |
| Other neurological disorders code exclusions = Neurosurgery | C70                   | Malignant neoplasm of meninges                                                                            |
|                                                             | C71                   | Malignant neoplasm of brain                                                                               |



|                                                                                                                                      |                       |                                                                                                                                                              |
|--------------------------------------------------------------------------------------------------------------------------------------|-----------------------|--------------------------------------------------------------------------------------------------------------------------------------------------------------|
|                                                                                                                                      | C72                   | Malignant neoplasm of spinal cord, cranial nerves and other parts of central nervous system                                                                  |
|                                                                                                                                      | C79.3                 | Secondary malignant neoplasm of brain and cerebral meninges                                                                                                  |
|                                                                                                                                      | C79.4                 | Secondary malignant neoplasm of other and unspecified parts of nervous system                                                                                |
|                                                                                                                                      | D33                   | Benign neoplasm of brain and other parts of central nervous system                                                                                           |
|                                                                                                                                      | I60                   | Nontraumatic subarachnoid hemorrhage                                                                                                                         |
|                                                                                                                                      | I61                   | Nontraumatic intracerebral hemorrhage                                                                                                                        |
|                                                                                                                                      | I62                   | Other and unspecified nontraumatic intracranial hemorrhage                                                                                                   |
| Neuro-inflammatory/demyelinating disease including multiple sclerosis (MS)                                                           | G35 and sub codes     | Multiple sclerosis                                                                                                                                           |
|                                                                                                                                      | G36 and sub codes     | Other acute disseminated demyelination                                                                                                                       |
|                                                                                                                                      | G37 and sub codes     | Other demyelinating diseases of central nervous system                                                                                                       |
| Refractory epilepsy (excluding partial or generalized status epilepticus)                                                            | G40.019               | Localization-related (focal) (partial) idiopathic epilepsy and epileptic syndromes with seizures of localized onset, intractable, without status epilepticus |
|                                                                                                                                      | G40.119               | Localization-related (focal) (partial) symptomatic epilepsy and epileptic syndromes with simple partial seizures, intractable, without status epilepticus    |
|                                                                                                                                      | G40.219               | Localization-related (focal) (partial) symptomatic epilepsy and epileptic syndromes with complex partial seizures, intractable, without status epilepticus   |
|                                                                                                                                      | G40.319               | Generalized idiopathic epilepsy and epileptic syndromes, intractable, without status epilepticus                                                             |
|                                                                                                                                      | G40.A19               | Absence epileptic syndrome, intractable, without status epilepticus                                                                                          |
|                                                                                                                                      | G40.B19               | Juvenile myoclonic epilepsy, intractable, without status epilepticus                                                                                         |
|                                                                                                                                      | G40.419               | Other generalized epilepsy and epileptic syndromes, intractable, without status epilepticus                                                                  |
|                                                                                                                                      | G40.804               | Other epilepsy, intractable, without status epilepticus                                                                                                      |
|                                                                                                                                      | G40.814               | Lennox-Gastaut syndrome, intractable, without status epilepticus                                                                                             |
|                                                                                                                                      | G40.824               | Epileptic spasms, intractable, without status epilepticus                                                                                                    |
|                                                                                                                                      | G40.919               | Epilepsy, unspecified, intractable, without status epilepticus                                                                                               |
| Anterior horn cell diseases (AHCD)                                                                                                   | G12 and sub codes     | Spinal muscular atrophy and related syndromes                                                                                                                |
| Any psychiatric symptoms (any psych sx) not including drug or alcohol abuse, obsessive compulsive disorder or disorders of attention | F30-F39 and sub codes | Mood [affective] disorders                                                                                                                                   |
|                                                                                                                                      | F20-F29 and sub codes | Schizophrenia, schizotypal, delusional, and other non-mood psychotic disorders                                                                               |
|                                                                                                                                      | F40 and sub codes     | Phobic anxiety disorders                                                                                                                                     |
|                                                                                                                                      | F41 and sub codes     | Other anxiety disorders                                                                                                                                      |

|                                                    |                      |                                                                               |
|----------------------------------------------------|----------------------|-------------------------------------------------------------------------------|
|                                                    | F43.1 and sub codes  | Post-traumatic stress disorder (PTSD)                                         |
|                                                    | F60 and sub codes    | Specific personality disorders                                                |
| Mood disorders                                     | F30-39 and sub codes | Mood [affective] disorders                                                    |
| Anxiety disorders                                  | F40 and sub codes    | Phobic anxiety disorders                                                      |
|                                                    | F41 and sub codes    | Other anxiety disorders                                                       |
| Functional somatic disorders(FSD)                  | K58                  | Irritable bowel syndrome                                                      |
|                                                    | M79.7                | Fibromyalgia                                                                  |
|                                                    | R53.82               | Chronic fatigue, unspecified (proxy for Chronic fatigue syndrome)             |
|                                                    | F45 and sub codes    | Somatoform disorders                                                          |
|                                                    | G90.5 and sub codes  | Complex regional pain syndrome I (CRPS I)                                     |
|                                                    | F44.8                | Other dissociative and conversion disorders                                   |
|                                                    | F45.8                | Other somatoform disorders                                                    |
| <b>ICD-9-CM Procedure codes dictionary</b>         |                      |                                                                               |
| All rehabilitation services                        | 93 and sub codes     | Physical Therapy, Respiratory Therapy, Rehabilitation, And Related Procedures |
| Physical therapy (PT)                              | 93.0 and sub codes   | Diagnostic Physical Therapy                                                   |
|                                                    | 93.1 and sub codes   | Physical Therapy Exercises                                                    |
|                                                    | 93.2 and sub codes   | Other Physical Therapy Musculoskeletal Manipulation                           |
|                                                    | 93.3 and sub codes   | Other Physical Therapy Therapeutic Procedures                                 |
| Occupational therapy (OT)                          | 93.83                | Occupational therapy                                                          |
| Speech and language pathology (SLP)                | 93.7 and sub codes   | Speech And Reading Rehabilitation And Rehabilitation Of The Blind             |
| Psychiatric consultation (Psych consult)           | 94.1 and sub codes   | Psychiatric Interviews, Consultations and Evaluations                         |
| Psychiatric treatment/procedures (Psych treatment) | 94 and sub codes     | Procedures Related To The Psyche                                              |
| All radiology                                      | 87 and sub codes     | Other Diagnostic Radiology And Related Techniques                             |
|                                                    | 88 and sub codes     | Other Diagnostic Radiology And Related Techniques                             |
| Neuroradiology                                     | 87.03                | Computerized axial tomography of head (CT head)                               |
|                                                    | 88.38                | Other computerized axial tomography (CT spine)                                |
|                                                    | 88.91                | Magnetic resonance imaging of brain and brain stem (MRI head)                 |
|                                                    | 88.93                | Magnetic resonance imaging of spinal canal (MRI spine)                        |
|                                                    | 88.41                | Arteriography of cerebral arteries                                            |
|                                                    | 88.61                | Phlebography of veins of head and neck using contrast material                |
|                                                    | 87.01                | Pneumoencephalogram                                                           |
|                                                    | 87.02                | Oher contrast radiogram of head                                               |

|                                                          |                       |                                                                               |
|----------------------------------------------------------|-----------------------|-------------------------------------------------------------------------------|
|                                                          | 87.04                 | Other tomography of head                                                      |
|                                                          | 87.17                 | Other x-ray of skull                                                          |
|                                                          | 87.2 and sub codes    | X-ray of spine                                                                |
| Electroencephalogram (EEG) or long-term monitoring (LTM) | 89.14                 | Electroencephalogram                                                          |
|                                                          | 89.19                 | Video and radio-telemetered electroencephalographic monitoring                |
| Lumbar puncture (LP)                                     | 03.31                 | Spinal tap                                                                    |
| <b>ICD-10-PCS Procedure codes dictionary</b>             |                       |                                                                               |
| All rehabilitation services                              | F00-F0F and sub codes | Physical Therapy, Respiratory Therapy, Rehabilitation, And Related Procedures |
| Physical therapy (PT)                                    | F01 and sub codes     | Motor and/or Nerve Function Assessment                                        |
|                                                          | F02 and sub codes     | Activities of Daily Living Assessment                                         |
|                                                          | F070-F073             | Motor Treatment – Neurological System                                         |
|                                                          | F07J-F07M             | Motor Treatment – Musculoskeletal System                                      |
|                                                          | F0C3                  | Vestibular Treatment – Neurological System                                    |
| Occupational therapy (OT)                                | F08J-F08M             | Activities of Daily Living Treatment - Musculoskeletal System                 |
| Speech and language pathology (SLP)                      | F003 and sub codes    | Speech Assessment - Neurological System - Whole Body                          |
|                                                          | F00Z and sub codes    | Speech Assessment - None                                                      |
|                                                          | F063 and sub codes    | Speech Treatment - Neurological System - Whole Body                           |
|                                                          | F06Z and sub codes    | Speech Treatment - None                                                       |
| Psychiatric consultation (Psych consult)                 | GZ14 and sub codes    | Neurobehavioral and Cognitive Status                                          |
|                                                          | GZ5 and sub scores    | Individual Psychotherapy                                                      |
| Psychiatric treatment/procedures (Psych treatment)       | GZ1-GZJ and sub codes | Mental Health procedures                                                      |
| All radiology                                            | B0-BY and sub codes   | Imaging                                                                       |
| Neuroradiology                                           | B0 and sub codes      | Imaging - Central Nervous System                                              |
|                                                          | B020 and sub codes    | Computerized axial tomography of brain (CT head)                              |
|                                                          | B02B                  | Computerized axial tomography of spinal cord (CT spine)                       |
|                                                          | B030                  | Magnetic Resonance Imaging brain (MRI head)                                   |
|                                                          | B03B                  | Magnetic Resonance Imaging spinal cord (MRI spine)                            |
| Electroencephalogram (EEG) or long-term monitoring (LTM) | 4A00X                 | Measurement of Central Nervous Electrical Activity, External Approach         |
|                                                          | 4A0034Z               | Measurement of Central Nervous Electrical Activity, Percutaneous Approach     |
|                                                          | 4A10X4Z               | Monitoring of Central Nervous Electrical Activity, External Approach          |
|                                                          | 4A1034Z               | Monitoring of Central Nervous Electrical Activity, Percutaneous Approach      |

|                      |        |                                                             |
|----------------------|--------|-------------------------------------------------------------|
| Lumbar puncture (LP) | 009U3Z | Drainage of Spinal Canal, Percutaneous Approach, Diagnostic |
|----------------------|--------|-------------------------------------------------------------|

**eTable 2. Composition of FND diagnosis and overlap between FND and neurological comparator diagnoses across databases**

| ICD-9CM coding                                                       |                                                                           |                                                                           |                                                                              |                                                                                |
|----------------------------------------------------------------------|---------------------------------------------------------------------------|---------------------------------------------------------------------------|------------------------------------------------------------------------------|--------------------------------------------------------------------------------|
| FND and degree of overlap with other neurological disorders          | Adults age 18+ (NIS 2014), subpopulation n= 5,950,391 weighted 29,751,964 | Pediatric age 5-17 (KID 2012), subpopulation n=778,518 weighted 1,098,342 | Adults age 18+ (NEDS 2014), subpopulation n= 25,132,855 weighted 111,530,998 | Pediatric age 5-17 (NEDS 2014), subpopulation n= 3,361,983 weighted 14,969,328 |
| Composition of FND cohort                                            |                                                                           |                                                                           |                                                                              |                                                                                |
| FND total, N                                                         | 23795                                                                     | 2686                                                                      | 33440                                                                        | 3345                                                                           |
| 300.11 Conversion disorder, N (%)                                    | 22890 (96.32)                                                             | 2640 (98.27)                                                              | 32214 (96.34)                                                                | 3286 (98.25)                                                                   |
| 306.0 Musculoskeletal malfunction arising from mental factors, N (%) | 935 (3.93)                                                                | 52 (1.95)                                                                 | 1315 (3.93)                                                                  | 168 (2.04)                                                                     |
| Overlap between FND and comparator conditions                        |                                                                           |                                                                           |                                                                              |                                                                                |
| MS and FND, N (% of MS )                                             | 525 (0.34)                                                                | ≤10 (0.90)                                                                | 463 (0.17)                                                                   | ≤10                                                                            |
| Refractory epilepsy and FND, N (% of ref epilepsy)                   | 250 (1.03)                                                                | 23 (0.24)                                                                 | 76 (0.44)                                                                    | ≤10                                                                            |
| AHCD and FND, N (% of AHCD)                                          | ≤10                                                                       | 0, 0 (0)                                                                  | ≤10                                                                          | 0 (0)                                                                          |
| ICD-10CM coding                                                      |                                                                           |                                                                           |                                                                              |                                                                                |
| FND and degree of overlap with other neurological disorders          | Adults age 18+ (NIS 2017), subpopulation n=6,084,184, weighted 30,420,907 | Pediatric age 5-17 (KID 2016), subpopulation n=697,625 weighted 965,132   | Adults age 18+ (NEDS 2017), subpopulation n= 27,275,790 weighted 118,034,396 | Pediatric age 5-17 (NEDS 2017), subpopulation n= 3,604,331 weighted 15,522,879 |
| FND total, N                                                         | 22895                                                                     | 1264                                                                      | 36359                                                                        | 3800                                                                           |
| Overlap between FND and comparator conditions                        |                                                                           |                                                                           |                                                                              |                                                                                |
| MS and FND, N (% of MS )                                             | 715 (0.42)                                                                | ≤10                                                                       | 757 (0.24)                                                                   | ≤10                                                                            |
| MS and FND, N (% of FND )                                            | 715 (3.12)                                                                | ≤10                                                                       | 757 (2.08)                                                                   | ≤10                                                                            |
| Refractory epilepsy and FND, N (% of ref epilepsy)                   | 195 (0.68)                                                                | 17 (0.13)                                                                 | 120 (0.43)                                                                   | ≤10                                                                            |
| Refractory epilepsy and FND, N (% of FND)                            | 195 (0.85)                                                                | 17 (1.33)                                                                 | 120 (0.33)                                                                   | ≤10                                                                            |
| AHCD and FND, N (% of AHCD)                                          | ≤10                                                                       | 0 (0)                                                                     | ≤10                                                                          | 0 (0)                                                                          |
| AHCD and FND, N (% of FND)                                           | ≤10                                                                       | 0 (0)                                                                     | ≤10                                                                          | 0 (0)                                                                          |
| Overlap with other pertinent conditions                              |                                                                           |                                                                           |                                                                              |                                                                                |
| Epilepsy and FND, N (% of Epilepsy)                                  | 3240 (0.30)                                                               | 139 (0.20)                                                                | 3255 (0.17)                                                                  | 191 (0.15)                                                                     |
| Epilepsy and FND, N (% of FND)                                       | 3240 (14.15)                                                              | 139 (11.02)                                                               | 3255 (8.95)                                                                  | 191 (5.02)                                                                     |

Where applicable, data are presented with weighted estimate sample (N) and corresponding percentage of total (column %). Unweighted value (n) is not shown; in cases where the unweighted  $n \leq 10$ , the weighted N are not available (denoted by  $\leq 10$ ). This reflects the most recent data from the 2017 NIS, 2016 KID and 2017 NEDS for ICD-10 data and 2014 NIS, 2012 KID and 2014 NEDS for ICD-9 data. Data on composition of FND diagnosis across its composite ICD-9 diagnosis codes and degree of overlap between FND and the neurological comparator conditions (both ICD-9 and ICD-10 coding) is demonstrated. Total % in the composition of the ICD-9 FND cohort exceed 100%, as some patients having both ICD-9 300.11 and 306.0 diagnostic codes.

Abbreviations: NIS: National/Nationwide Inpatient Sample; KID: Kids' Inpatient Database; NEDS: Nationwide Emergency Department Sample; FND: functional neurological disorder; MS: demyelinating disease including multiple sclerosis; ref epilepsy: refractory epilepsy; AHCD: anterior horn cell diseases including amyotrophic lateral sclerosis and spinal muscular atrophy

**eTable 3. Missing data for healthcare utilization comparison from NIS 2017, KID 2016 and NEDS 2017**

|                                                | Adults age 18+ (NIS 2017),<br>subpopulation n=6,084,184,<br>weighted 30,420,907 |                                                      | Pediatric age 5-17 (KID 2016),<br>subpopulation n=697,625 weighted<br>965,132 |                                                 | Adults age 18+ (NEDS 2017),<br>subpopulation n= 27,275,790<br>weighted 118,034,396 |                                                     | Pediatric age 5-17 (NEDS 2017),<br>subpopulation n= 3,604,331<br>weighted 15,522,879 |                                                   |
|------------------------------------------------|---------------------------------------------------------------------------------|------------------------------------------------------|-------------------------------------------------------------------------------|-------------------------------------------------|------------------------------------------------------------------------------------|-----------------------------------------------------|--------------------------------------------------------------------------------------|---------------------------------------------------|
| Demographic variable                           | FND, n=4579,<br>weighted 22,895                                                 | Non-FND neuro,<br>n=983,923<br>weighted<br>4,919,614 | FND, n=913,<br>weighted 1,264                                                 | Non-FND neuro,<br>n=89,261,<br>weighted 124,053 | FND, n=8215,<br>weighted 36359                                                     | Non-FND neuro,<br>n=1986050,<br>weighted<br>8625167 | FND, n=856,<br>weighted 3,800                                                        | Non-FND neuro,<br>n=75974,<br>weighted<br>328,609 |
| Age No. with data, (%)                         | 4579, 22895 (100)                                                               | 983923, 4,919,614 (100)                              | 913, 1264 (100)                                                               | 89261, 124,053 (100)                            | 8215, 36359 (100.00)                                                               | 1986050, 8625167 (100.00)                           | 856, 3800 (100.00)                                                                   | 75974, 328609 (100.00)                            |
| Gender, No. with data, n (%)                   | 4578, 22890 (99.98)                                                             | 983893, 4919464 (100.00)                             | 913, 1264 (100)                                                               | 89245, 124031 (99.98)                           | 8214, 36354 (99.99)                                                                | 1985970, 8624789 (100.00)                           | 856, 3800 (100.00)                                                                   | 75970, 328587 (99.99)                             |
| Race No. with data, n (%)                      | 4392, 21960 (95.92)                                                             | 951901, 4759504 (96.75)                              | 830, 1147 (90.91)                                                             | 81839, 113634 (91.69)                           |                                                                                    |                                                     |                                                                                      |                                                   |
| Elective/non-elective, No. with data, n (%)    | 4569, 22845 (99.78)                                                             | 982030, 4910149 (99.81)                              | 912, 1262 (99.89)                                                             | 88977, 123675 (99.68)                           |                                                                                    |                                                     |                                                                                      |                                                   |
| Zip code Income quartile, No. with data, n (%) | 4495, 22475 (98.17)                                                             | 967311, 4836554 (98.31)                              | 901, 1247 (98.69)                                                             | 87803, 122007 (98.37)                           | 8066, 35697 (98.19)                                                                | 1952241, 8479642 (98.30)                            | 835, 3705 (97.55)                                                                    | 75122, 324939 (98.88)                             |
| LOS No. with data, n (%)                       | 4759, 23795 (100)                                                               | 983811, 4919054 (99.99)                              | 913, 1264 (100)                                                               | 89238, 124022 (99.97)                           |                                                                                    |                                                     |                                                                                      |                                                   |
| Disposition category, No. with data, n (%)     | 4576, 22880 (99.93)                                                             | 983145, 4915724 (99.92)                              | 913, 1264 (100)                                                               | 89164, 123915 (99.89)                           | 8215, 36359 (100.00)                                                               | 1986050, 8625167 (100.00)                           | 856, 3800 (100.00)                                                                   | 75974, 328609 (100.00)                            |
| Primary payer with data, n, N (%)              | 4567, 22835 (99.74)                                                             | 982434, 4912169 (99.85)                              | 912, 1262 (99.84)                                                             | 89097, 123818 (99.81)                           | 8170, 36125 (99.36)                                                                | 1981962, 8604396 (99.76)                            | 855, 3795 (99.87)                                                                    | 75817, 327786 (99.75)                             |

All data are stated as sample number, weighted number and % non-missing. Empty cells in the NEDS are due to the data not being covered in this database.

Abbreviations: NIS: National/Nationwide Inpatient Sample; KID: Kids' Inpatient Database; NEDS: Nationwide Emergency Department Sample; FND: Functional neurological disorders; non-FND neuro: non-FND non-headache or neurosurgical neurological comparison group; No.: number; LOS: length of stay.

**eTable 4. Clinical characteristics of FND vs other neurological disorders in adult and pediatric populations and inpatient healthcare resource utilization (NIS 2014 and KID 2012 ICD-9 comparator data)**

|                                      | Adults age 18+ (NIS 2014), subpopulation n= 5,950,391 weighted 29,751,964 |                            |         | Pediatric age 5-17 (KID 2012), subpopulation n=778,518 weighted 1,098,342 |                          |         |
|--------------------------------------|---------------------------------------------------------------------------|----------------------------|---------|---------------------------------------------------------------------------|--------------------------|---------|
| Demographic variable                 | FND, N= 23,795                                                            | Non-FND neuro, N=4,740,612 | p       | FND, N=2,686                                                              | Non-FND neuro, N=119,433 | p       |
| Age, median (IQR)                    | 44.48 (32.16, 55.75)                                                      | 66.68 (52.73, 79.13)       | <0.0001 | 14.16 (11.90, 15.55)                                                      | 11.46 (7.51, 14.58)      | <0.0001 |
| Age category, yr N (%)               |                                                                           |                            | <0.0001 |                                                                           |                          | <0.0001 |
| 5-12                                 |                                                                           |                            |         | 700 (26.06)                                                               | 62,186 (57.03)           |         |
| 13-17                                |                                                                           |                            |         | 1,986 (73.94)                                                             | 46,850 (42.97)           |         |
| 18-40                                | 9,365 (39.36)                                                             | 550,845 (11.62)            |         |                                                                           |                          |         |
| 41-65                                | 11,555 (48.56)                                                            | 1,640,270 (34.60)          |         |                                                                           |                          |         |
| >65                                  | 2,875 (12.08)                                                             | 2,549,496 (53.78)          |         |                                                                           |                          |         |
| Male, N (%)                          | 6,285 (26.41)                                                             | 2,054,336 (43.34)          | <0.0001 | 769 (28.63)                                                               | 60,584 (50.73)           | <0.0001 |
| White, N (%)                         | 14,530 (65.54)                                                            | 3,268,312 (72.47)          | <0.0001 | 1,415 (60.02)                                                             | 61,554 (56.95)           | 0.51    |
| Non-elective, N (%)                  | 20,520 (86.55)                                                            | 3,949,811 (83.64)          | 0.0004  | 2,295 (85.63)                                                             | 83,326 (69.96)           | <0.0001 |
| Socioeconomic status                 |                                                                           |                            |         |                                                                           |                          |         |
| Zip code Income quartile, N (%)      |                                                                           |                            | <0.0001 |                                                                           |                          | 0.68    |
| 0-25th percentile                    | 8,190 (35.25)                                                             | 1,381,616 (29.78)          |         | 701 (26.75)                                                               | 31,283 (26.76)           |         |
| 26-50th percentile                   | 6,575 (28.30)                                                             | 1,294,245 (27.90)          |         | 665 (25.35)                                                               | 28,145 (24.08)           |         |
| 51-75th percentile                   | 5,195 (22.32)                                                             | 1,058,225 (22.81)          |         | 639 (24.38)                                                               | 28,862 (24.69)           |         |
| 76-100th percentile                  | 3,275 (14.10)                                                             | 905,571 (19.52)            |         | 617 (23.52)                                                               | 28,598 (24.47)           |         |
| Medical and psychiatric demographics |                                                                           |                            |         |                                                                           |                          |         |



|                                              |                |                   |         |               |                |         |
|----------------------------------------------|----------------|-------------------|---------|---------------|----------------|---------|
| No. of chronic conditions, mean (SE mean)    | 6.68 (0.06)    | 7.34 (0.02)       | <0.0001 | 3.25 (0.06)   | 3.67 (0.04)    | <0.0001 |
| Psychiatric comorbidity                      |                |                   |         |               |                |         |
| Any psych sx, N (%)                          | 13,250 (55.68) | 1,100,830 (23.22) | <0.0001 | 1,093 (40.70) | 11,771 (9.86)  | <0.0001 |
| Mood disorder, N (%)                         | 6,490 (27.27)  | 376,290 (7.94)    | <0.0001 | 417 (15.53)   | 6,507 (5.45)   | <0.0001 |
| Anxiety disorders, N (%)                     | 8,505 (35.74)  | 699,395 (14.75)   | <0.0001 | 750 (27.93)   | 5,633 (4.72)   | <0.0001 |
| Associated functional conditions             |                |                   |         |               |                |         |
| FSD, N (%)                                   | 2480 (10.42)   | 189730 (4.00)     | <0.0001 | 151 (5.61)    | 1198 (1.00)    | <0.0001 |
| Length of stay                               |                |                   |         |               |                |         |
| Length of stay, days, mean (SE mean)         | 4.62 (0.10)    | 5.87 (0.03)       | <0.0001 | 4.45 (0.34)   | 5.43 (0.10)    | 0.0021  |
| Utilization of hospital services             |                |                   |         |               |                |         |
| All rehab services (PT/OT/speech etc), N (%) | 755 (3.17)     | 242,155 (5.11)    | <0.0001 | 112 (4.17)    | 6,792 (5.69)   | 0.42    |
| PT, N (%)                                    | 425 (1.79)     | 97,095 (2.05)     | 0.25    | 96 (3.59)     | 1,891 (1.58)   | 0.31    |
| OT, N (%)                                    | 320 (1.34)     | 78,925 (1.66)     | 0.12    | 72 (2.67)     | 1,372 (1.15)   | 0.40    |
| SLP, N (%)                                   | 75 (0.32)      | 34,235 (0.72)     | <0.0001 | ≤10           | 588 (0.49)     | 0.82    |
| Psych management, (%)                        | 320 (1.34)     | 48,625 (1.03)     | 0.14    | 25 (0.92)     | 490 (0.41)     | 0.037   |
| Psych consult, N (%)                         | ≤10            | 3,045 (0.06)      | 0.14    | ≤10           | 47 (0.04)      | 0.026   |
| Workup                                       |                |                   |         |               |                |         |
| All radiology, N (%)                         | 2,075 (8.72)   | 520,500 (10.98)   | <0.0001 | 261 (9.71)    | 8,995 (7.53)   | 0.004   |
| Neuroradiology, N (%)                        | 1,180 (4.96)   | 162,775 (3.43)    | <0.0001 | 228 (8.50)    | 6,161 (5.16)   | <0.0001 |
| CT head, N (%)                               | 515 (2.16)     | 71,215 (1.50)     | 0.0091  | 32 (1.19)     | 1,284 (1.08)   | 0.66    |
| CT spine, N (%)                              | ≤10            | 11,250 (0.24)     | 0.51    | ≤10           | 130 (0.11)     | 0.68    |
| MRI head, N (%)                              | 630 (2.65)     | 60,465 (1.28)     | <0.0001 | 173 (6.44)    | 4,391 (3.68)   | <0.0001 |
| MRI spine, N (%)                             | 180 (0.76)     | 9,290 (0.20)      | <0.0001 | 61 (2.27)     | 810 (0.68)     | <0.0001 |
| EEG or EEG LTM, N (%)                        | 2,385 (10.02)  | 69,090 (1.46)     | <0.0001 | 452 (16.84)   | 13,371 (11.20) | 0.0004  |

|                             |                |                   |         |              |                 |         |
|-----------------------------|----------------|-------------------|---------|--------------|-----------------|---------|
| LP, N (%)                   | 1,095 (4.60)   | 106,365 (2.24)    | <0.0001 | 213 (7.92)   | 7,741 (6.48)    | 0.0375  |
| Disposition                 |                |                   |         |              |                 |         |
| Disposition category, N (%) |                |                   | <0.0001 |              |                 | <0.0001 |
| Home                        | 16,690 (70.19) | 2,216,636 (46.78) |         | 2449 (91.21) | 104,714 (87.69) |         |
| Other facility/rehab        | 3,605 (15.16)  | 1,449,196 (30.59) |         | 139 (5.19)   | 4,197 (3.51)    |         |
| Home with home health care  | 2,430 (10.22)  | 760,625 (16.05)   |         | 28 (1.05)    | 6,842 (5.73)    |         |
| AMA                         | 500 (2.10)     | 49,580 (1.05)     |         | ≤10          | 143 (0.12)      |         |
| Died                        | 140 (0.59)     | 138,610 (2.93)    |         | 0 (0)        | 786 (0.66)      |         |

Where applicable, data are presented with weighted estimate sample (N) and corresponding percentage of total (column %), or otherwise described in parentheses based on non-missing data. Unweighted value (n) is not shown; in cases where the unweighted n≤10, the weighted N are not available (denoted by ≤10). P values are t tests for continuous variables and Chi squared p value for categorical variables.

Abbreviations: NIS: National/Nationwide Inpatient Sample; KID: Kids' Inpatient Database; FND: Functional neurological disorders; non-FND neuro: non-FND non-headache or neurosurgical neurological comparison group; IQR: Interquartile range; No.: number; Any psychiatric sx: the presence of anxiety, affective, psychotic, or personality disorders; FSD: Functional somatic disorders (IBS, fibromyalgia, chronic fatigue, etc.); Rehab: rehabilitation; PT: physical therapy; OT: occupational therapy; SLP: Speech and language pathology; Psych: psychiatric; EEG: electroencephalography; EEG LTM: EEG long-term monitoring/continuous video monitoring; CT: Computed tomography; MRI: Magnetic resonance imaging; LP: lumbar puncture; AMA: Against Medical Advice.

**eTable 5. Ten-year annual total charge estimates across all databases in adults and children 2008-2017, highlighting years with overlap**

| Year | Total charges adult FND                                                    |                        |                    | Total charges pediatric FND |                        |              | Overall Total                 |
|------|----------------------------------------------------------------------------|------------------------|--------------------|-----------------------------|------------------------|--------------|-------------------------------|
|      | NIS total charges, \$                                                      | NEDS Total charges, \$ | NIS + NEDS, \$     | KID total charges, \$       | NEDS Total charges, \$ | KID+NEDS, \$ | Adult + Pediatric charges, \$ |
| 2008 | \$407.2 M                                                                  | \$42.1 M               | \$449.4 M          |                             | \$3.7 M                |              |                               |
| 2009 | \$497.6 M                                                                  | \$54.8 M               | \$552.4 M          | \$51.1 M                    | \$3.6 M                | \$54.7 M     | \$607.1 M                     |
| 2010 | \$591.8 M                                                                  | \$66.2 M               | \$658.0 M          |                             | \$5.4 M                |              |                               |
| 2011 | \$636.6 M                                                                  | \$74.9 M               | \$711.4 M          |                             | \$7.0 M                |              |                               |
| 2012 | \$702.4 M                                                                  | \$86.4 M               | \$788.8 M          | \$74.7 M                    | \$7.4 M                | \$82.0 M     | \$870.9 M                     |
| 2013 | \$736.6 M                                                                  | \$93.8 M               | \$830.4 M          |                             | \$6.3 M                |              |                               |
| 2014 | \$859.1 M                                                                  | \$116.4 M              | \$975.5 M          |                             | \$9.1 M                |              |                               |
| 2015 | Data not shown owing to transition in coding from ICD-9 to ICD-10 mid-year |                        |                    |                             |                        |              |                               |
| 2016 | \$601.9 M                                                                  | \$73.3 M               | \$675.2 M          | \$35.7 M                    | \$8.0 M                | \$43.7 M     | \$718.9 M                     |
| 2017 | <b>\$1,065.6 M</b>                                                         | <b>\$149.9 M</b>       | <b>\$1,215.5 M</b> |                             | <b>\$12.9 M</b>        |              | <b>\$1,228.4* M</b>           |

All charge data are expressed in 2017 dollars and sample size is of non-missing data. Gradient fill in total charges and mean charges per patient in FND, with increasing red color indicating increasing charges. Data from NIS from 2008-2011 are adjusted using trend weights to account for change in database sampling.

**\* Not including KID inpatient charge data, which is unavailable for this year.**

Abbreviations: NIS: National/Nationwide Inpatient Sample; KID: Kids' Inpatient Database; NEDS: Nationwide Emergency Department Sample; FND: functional neurological disorder; M: million.
